# Supplementary material for: A label-free aptasensor for the detection of ATP based on turn-on fluorescence DNA-templated silver nanoclusters
Source: Royal Society of Chemistry journal article supplement (doi:10.1039/d2ra04636a), 2022-01-01
Supplement: d2ra04636a1.pdf [file d2ra04636a1.pdf]

## Electronic Supplementary Information

### **A label-free aptasensor for the detection of ATP based on turn-on fluorescent DNA-template silver nanoclusters**

Baozhu Zhang\*, Ziyao Yang, Yuxia Li, Ma Ling, Fenfang Li, Xiuqing Lv, Guangming Wen\*

*Department of Chemistry and Chemical Engineering, Jinzhong University, Yuci 030619, P. R. China*

---

\*Corresponding author.

E-mail address: [zhangbaozhu518@126.com](mailto:zhangbaozhu518@126.com); [wgm@sxu.edu.cn](mailto:wgm@sxu.edu.cn)

**Table S1** Names and sequences of the oligonucleotides.

| Oligonucleotids | Sequences (5' - 3')                                               |
|-----------------|-------------------------------------------------------------------|
| BT5A5           | CCCTTAATCCCCTTTTAACCTGGGGGAGTATTGCGGAGGAAGGT<br>AAAAACCCTAACTCCCC |
| BT5A5(R)        | CCCTTAATCCCCTTTTAACCTGGGGGAGTATTGCGGAGGAAGGT                      |
| (L)BT5A5        | AACCTGGGGGAGTATTGCGGAGGAAGGTAAAAACCCTAACTCCCC                     |

**Table S2** Comparison of different strategies for the detection of ATP.

| Detection methods                                            | LOD     | Linear range | References |
|--------------------------------------------------------------|---------|--------------|------------|
| DNA-Ag NC fluorescence light-up system                       | 0.44 mM | 0-4 mM       | 30         |
| Fluorescence-based core-shell Ag@SiO <sub>2</sub> nanoflares | 8 μM    | 0-500 μM     | 34         |
| Light-up DNA-scaffolded silver nanoclusters                  | 0.81 mM | 1-6 mM       | 35         |
| Fluorescence DNA-Cu/Ag NCs                                   | 7.0 μM  | 2-18 mM      | 27         |
| Fluorescence DNA-Ag NCs                                      | 5.0 μM  | 6-27 mM      | this work  |

**Table S3** The lifetimes of (L)BT5A5-Ag NCs in the absence and presence of different concentration of ATP.

| Samples               | [ATP] (mM) | $\tau$ (ns) | $\chi^2$ |
|-----------------------|------------|-------------|----------|
| (L)BT5A5-Ag NCs       | 0          | 4.571       | 1.332    |
|                       | 3          | 4.317       | 1.313    |
| (L)BT5A5-Ag NCs + ATP | 6          | 4.195       | 1.336    |
|                       | 9          | 4.084       | 1.333    |

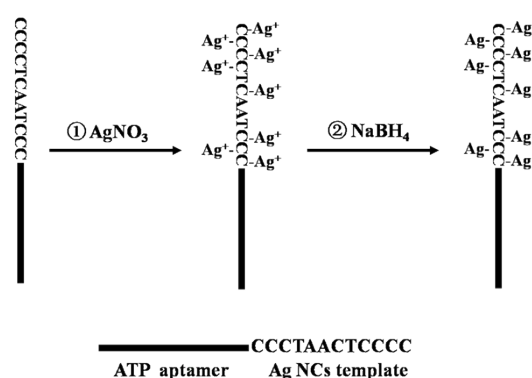**Fig. S1** Schematic illustration of synthesis of Ag NCs based DNA templates.

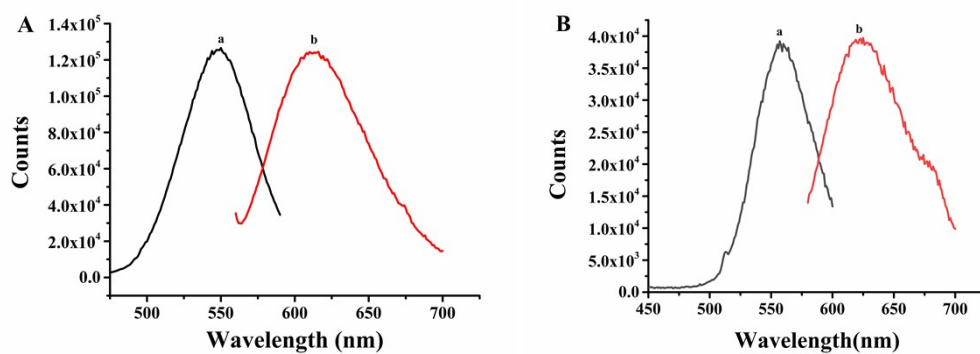

**Fig. S2** (A) The excitation (a) and emission (b) spectra of BT5A5-Ag NCs. (B) The excitation (a) and emission (b) spectra of BT5A5(R)-Ag NCs.

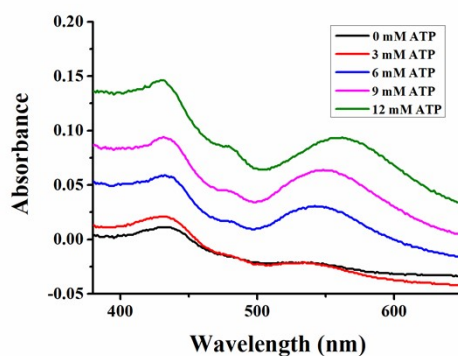

**Fig. S3** UV-Vis absorption spectra of (L)BT5A5-Ag NCs under different concentrations of ATP.

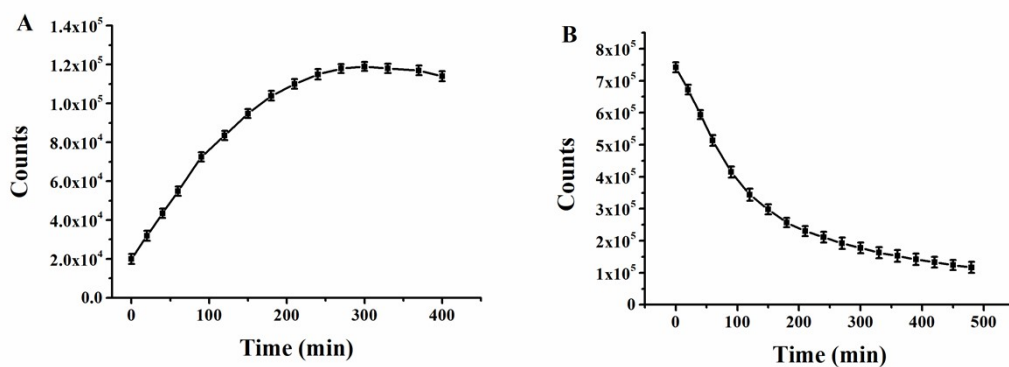

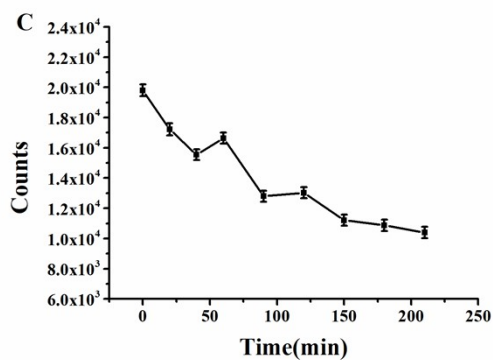

**Fig. S4** The change of fluorescence intensity of (L)BT5A5-Ag NCs (A), BT5A5-Ag NCs (B), and BT5A5(R)-Ag NCs(C), *against* the increasing time. Error bars represent the standard deviation of three independent measurements.  $c(\text{DNA}) = 3.0 \mu\text{M}$ .

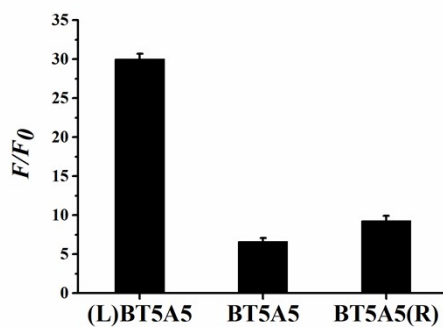

**Fig. S5** Relative fluorescence intensity ( $F/F_0$ ) of different DNA-Ag NCs.  $F_0$  and  $F$  are the maximum emission intensity of the DNA-Ag NCs before and after the addition of 21 mM ATP, respectively. The error bars represent the standard deviation of three independent measurements.

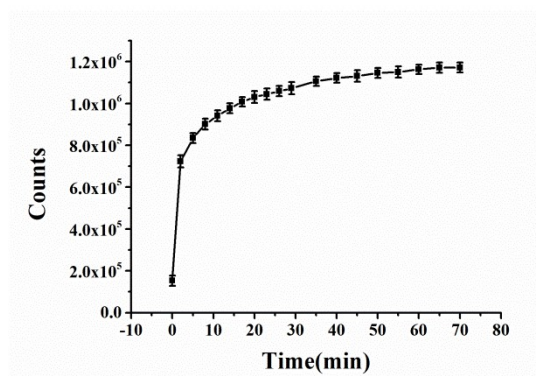

**Fig. S6** Fluorescence intensity of (L)BT5A5-Ag NCs as a function of incubation time of (L)BT5A5-Ag NCs and ATP.

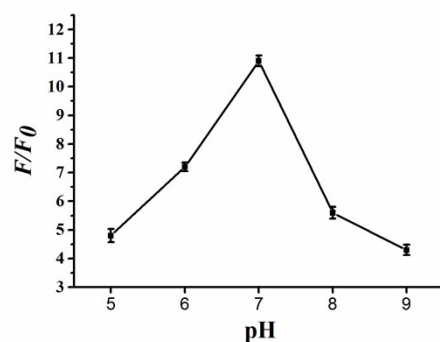

**Fig. S7** Relative fluorescence intensity ( $F/F_0$ ) of (L)BT5A5-Ag NCs at different pH values.  $F_0$  and  $F$  are the maximum emission intensity of (L)BT5A5-Ag NCs without and with 12 mM ATP, respectively. The error bars represent the standard deviation of three independent measurements.

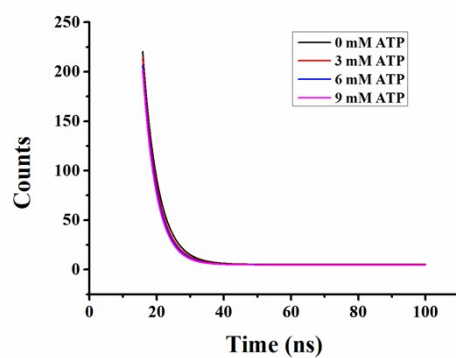

**Fig. S8** The fluorescence lifetimes of (L)BT5A5-Ag NCs (excitation at 405 nm and emission at 620 nm) incubating without and with the different concentration of ATP.
